# Supplementary material for: ZIF-8@CoFe2O4as a highly efficient bifunctional electrocatalyst for the methanol oxidation and oxygen evolution reactions
Source: Royal Society of Chemistry journal article supplement (doi:10.1039/d3cy00378g), 2023-01-01
Supplement: d3cy00378g1.pdf [file d3cy00378g1.pdf]

### Supplementary Information

## **ZIF-8@CoFe<sub>2</sub>O<sub>4</sub> as a highly efficient bifunctional electrocatalyst for methanol oxidation and oxygen evolution reactions**

T. V. M. Sreekanth<sup>a</sup>, K. Prasad<sup>b</sup>, J. Yoo<sup>c\*</sup>, J. Kim<sup>b\*</sup>, K. Yoo<sup>a\*\*</sup>

<sup>a</sup>School of Mechanical Engineering, Yeungnam University, 38541 Gyeongsan-si,  
Republic of Korea

<sup>b</sup>Energy Storage Conversion Laboratory, Department of Electrical Engineering, Chungnam  
National University, 34134 Daejeon, Republic of Korea

<sup>c</sup>Department of Automobile Engineering, Hanyang University, Seoul-04763, Republic of  
Korea

---

\*\*Corresponding author: Prof. K. Yoo; Email: [kisooyoo@yu.ac.kr](mailto:kisooyoo@yu.ac.kr)

\*Co-corresponding author: Prof. J. Yoo; [jihyungyoo@hanyang.ac.kr](mailto:jihyungyoo@hanyang.ac.kr)

Prof. J. Kim; Email: [whdgns0422@cnu.ac.kr](mailto:whdgns0422@cnu.ac.kr)

### **Chemical and Reagents**

Zinc nitrate hexahydrate, 2-methylimidazole, cobalt iron oxide nanoparticles, and methanol were purchased from Sigma-Aldrich. All reagents were of analytical grade and used as received without further purification.

### **Characterization**

The crystallinity of the as-prepared samples was measured using powder X-ray diffraction (XRD; PANalytical X'Pert PRO, USA) with a Cu K $\alpha$  radiation source ( $\lambda = 1.5405$  Å). Fourier-transform infrared (FTIR; Perkin-Elmer, Bruker) spectroscopy in attenuated total reflectance mode was performed to determine the vibrational modes of the samples. The elemental composition was determined by X-ray photoelectron spectroscopy (XPS; K-Alpha, Thermo Scientific, USA) using Al-K $\alpha$  radiation (1486.6 eV). The morphologies of the samples were investigated via scanning electron microscopy with a field emission gun (S4800, Hitachi, Japan) and high-resolution transmission electron microscopy (HR-TEM; Tecnai G2 F20 S-TWIN, FEI, USA) with an emission field gun of 200 kV in Schottky mode. Energy-dispersive X-ray analysis of the samples was performed using an X-ray column attached to the TEM instrument. The surface areas of the electrocatalysts were determined using 3Flex (Micromeritics, Norcross, GA, USA).

### **Fabrication of working electrodes**

A slurry was obtained by mixing the synthesized electrocatalyst (80 %), carbon black (10 %), and a poly (vinylidene fluoride) (PVDF-10 %) binder in NMP solvent. This slurry was coated onto a Ni foam current collector via drop casting. The coated current collector was dried for 10 h. The electrochemical cell with the electrode system consisted of a coated electrode as the working electrode, a Pt electrode as the counter electrode, and Hg/HgO as the reference electrode. The working electrode coated with the electrocatalyst was studied in alkaline (1.0 M KOH) and alcohol (1.0 M methanol) media.

### **Electrochemical Characterization**

The electrocatalytic performance was analyzed using electrochemical techniques such as cyclic voltammetry (CV), linear sweep voltammetry (LSV), electrochemical impedance spectroscopy (EIS), and chronoamperometry (CA) in a three-electrode system using a KOH (alkaline medium) electrolyte with and without the addition of methanol. CV analysis was performed at different scan rates in the 20–120 mV s<sup>-1</sup>. The methanolelectro-oxidation reaction was performed in the potential range 0–0.7 V. The LSV was measured in 0.0–1.0 V vs Hg/HgO at 5 mV s<sup>-1</sup>. EIS analyses were performed in a frequency range between 100 mHz and 1.0 MHz. The stability of the prepared samples was studied by chronoamperometry for up to 6 h.

The activity of the electrocatalysts was determined using the ECSA values. To determine the ECSA values of the electrocatalysts, CV measurements were performed in the nonFaradaic region of 0.03–0.015 V vs. the Hg/HgO electrode. The ECSA was calculated using the following equation [1].

$$\text{ECSA} = \frac{C_{dl}}{C_s}, \quad (s1)$$

where  $C_{dl}$  is the double-layer capacitance. Studies have shown that the double-layer charging current of a given capacitor generally levels off when plotted against the scan rate. This line is linearly related to  $C_{dl}$ , and the slope of the plot is equivalent to  $C_{dl}$ . Further,  $C_s$  is the general specific capacitance (0.04 mF cm<sup>-2</sup>), as reported in previous studies [1, 2]

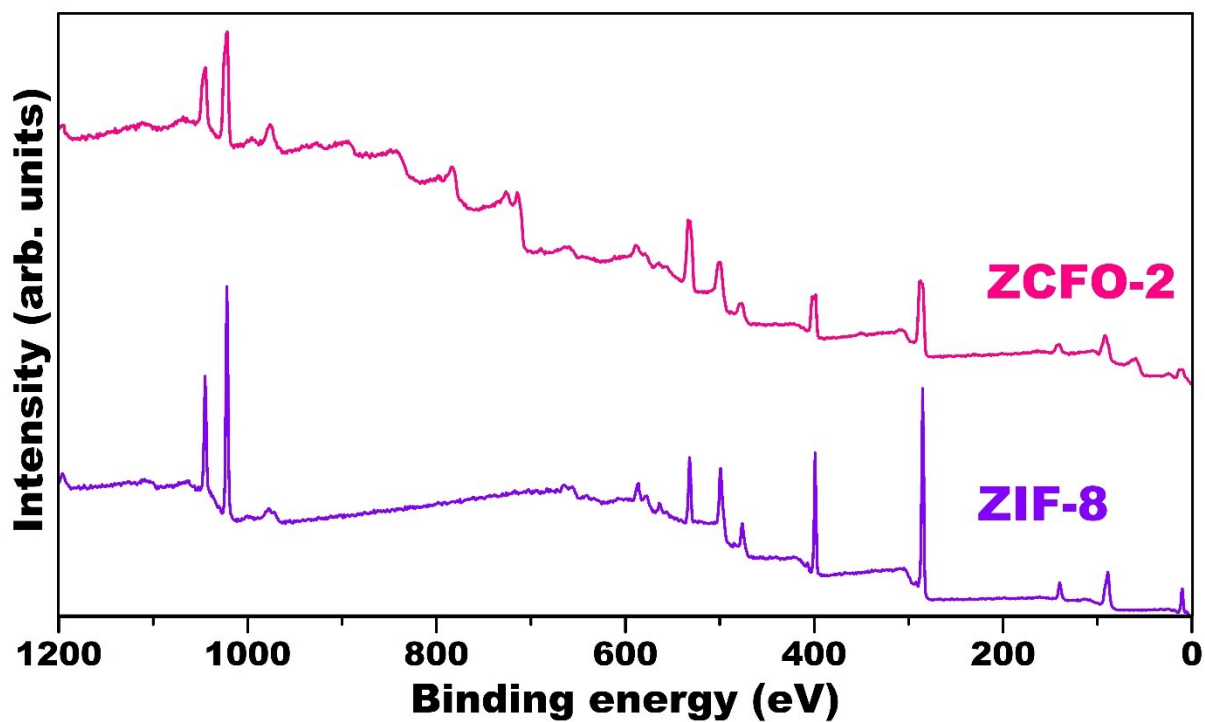

Fig. S1 Survey scan spectra of ZIF-8 and ZCFO-1 electrocatalysts.

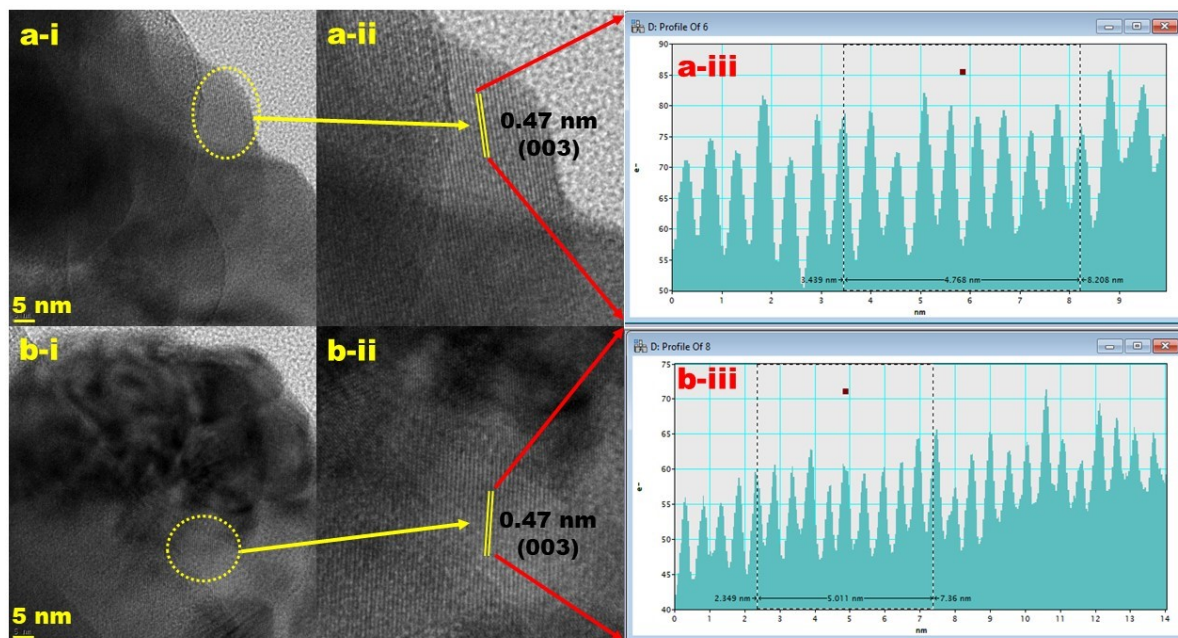

Fig. S2 (a-i), (b-ii) HR-TEM images, (a-ii), (b-ii) magnified TEM images along with d-spacing values, and (a-iii), (b-iii) corresponding line-profile images of the ZCFO-1 electrocatalyst.

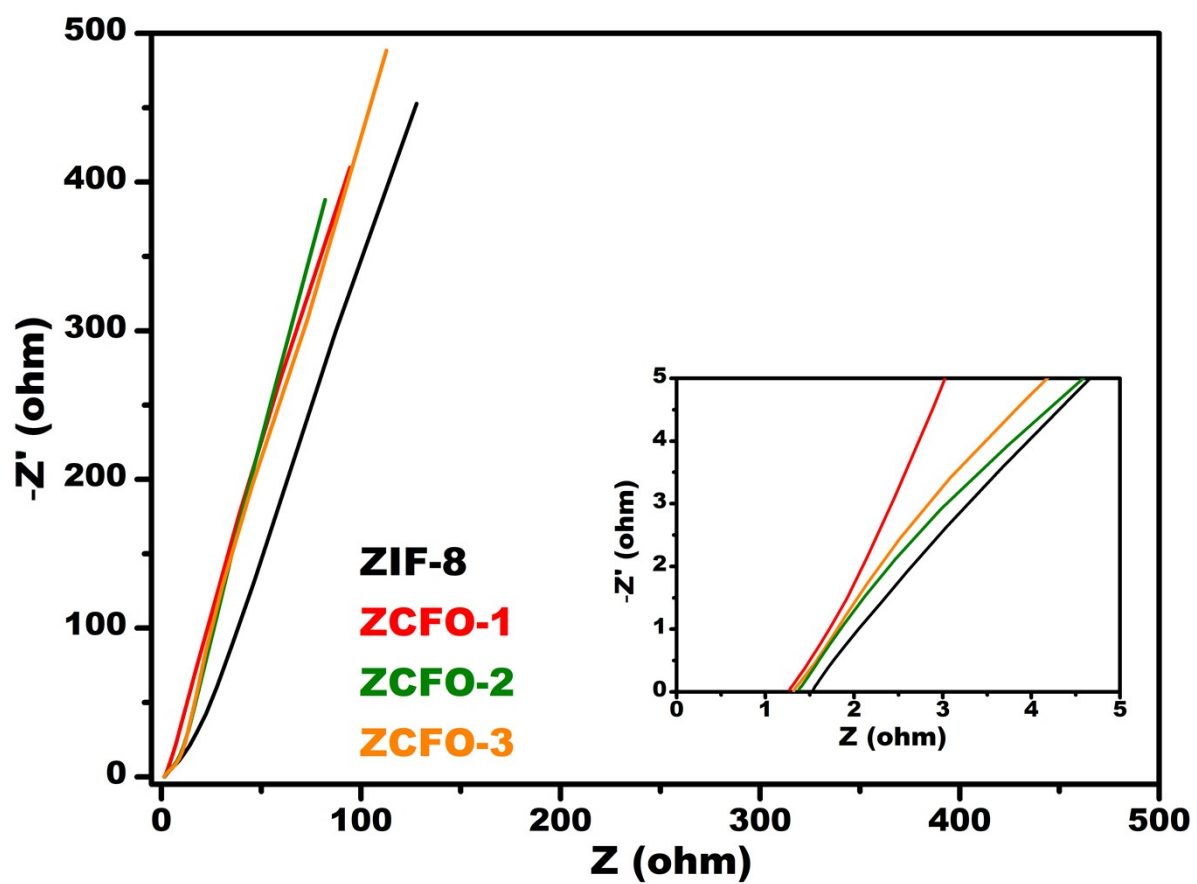

Fig. S3. Nyquist plots of the electrocatalysts ZIF-8, ZCFO-1, ZCFO-2, and ZCFO-3 (d) electrocatalysts in 1.0 M KOH.

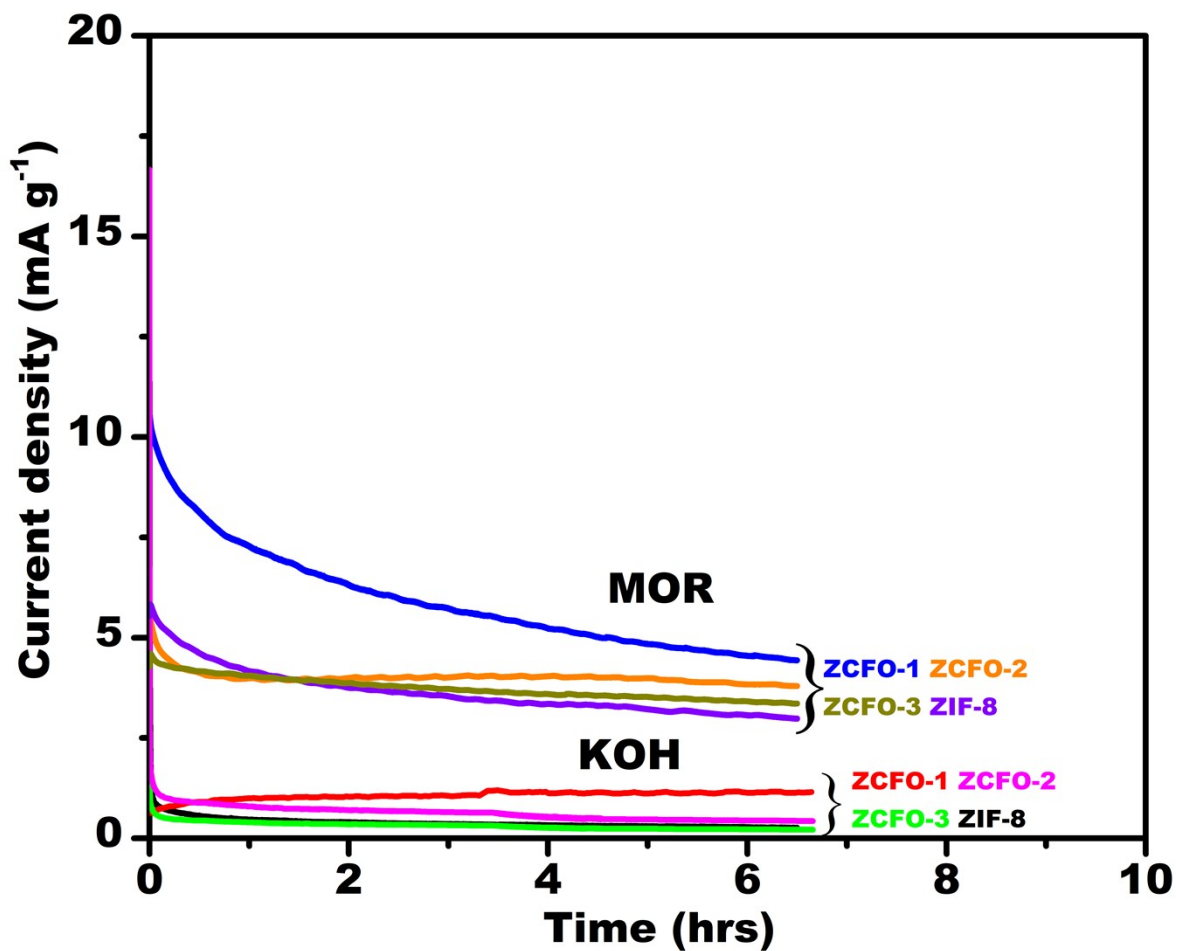

Fig. S4. Chronoamperometry curves of the ZIF-8, ZCFO-1, ZCFO-2, and ZCFO-3 (d) electrocatalysts in 1.0 M KOH along with 1.0 M of methanol

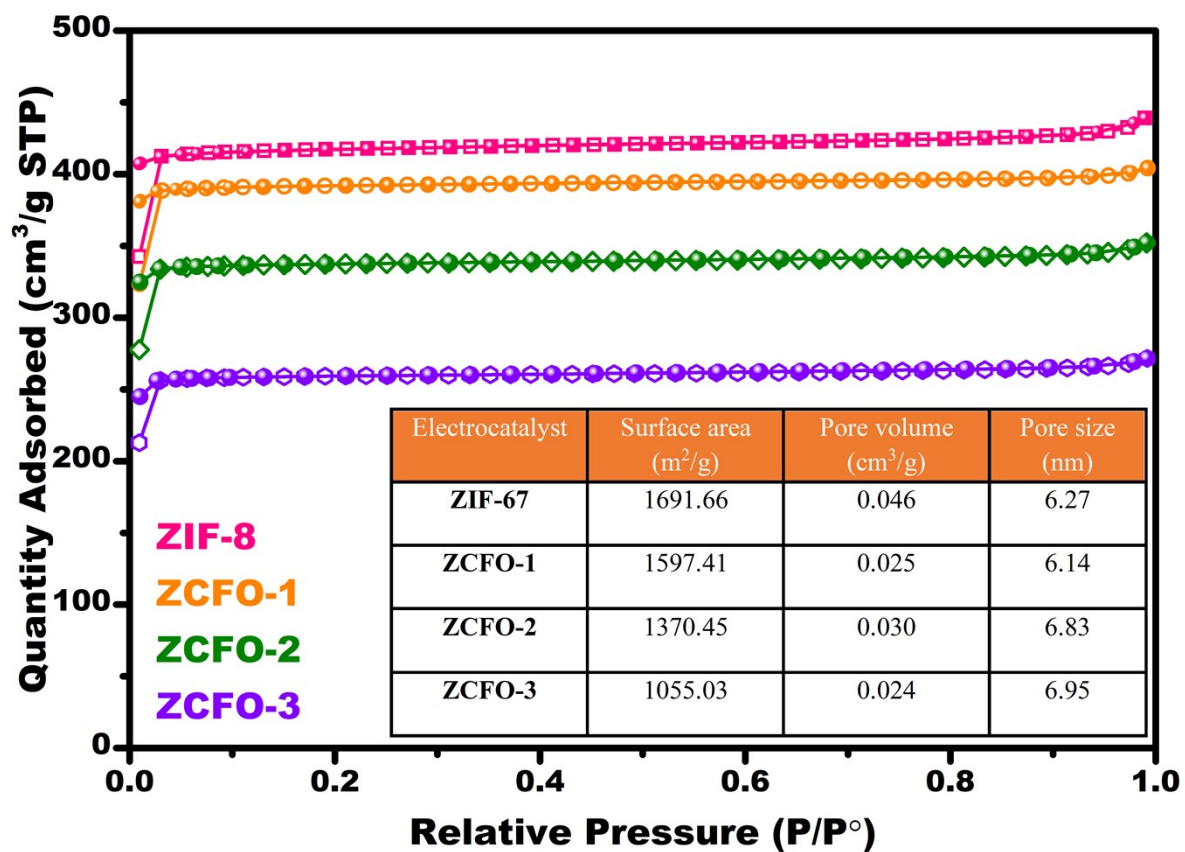

Fig. S5. Surface area analysis results: N<sub>2</sub> adsorption–desorption isotherm plots of (a) ZIF-8, (b) ZCFO-1, (c) ZCFO-2, and (d) ZCFO-3; Inset table represent the pore volume and pore size distribution results calculated from the BJH.

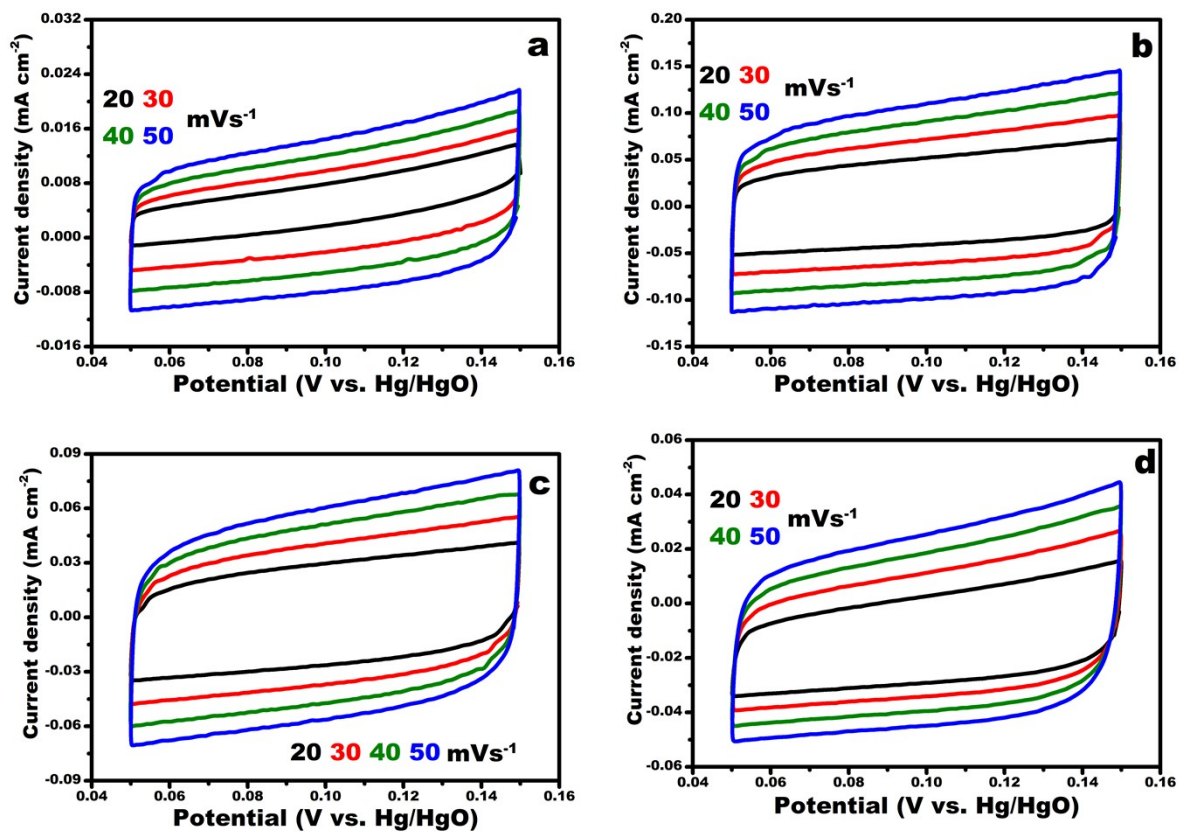

Fig. S6. CV curves of electrochemical active surface area test (ECSA) of (a) ZIF-8, (b) ZCFO-1, (c) ZCFO-2, and (d) ZCFO-3.

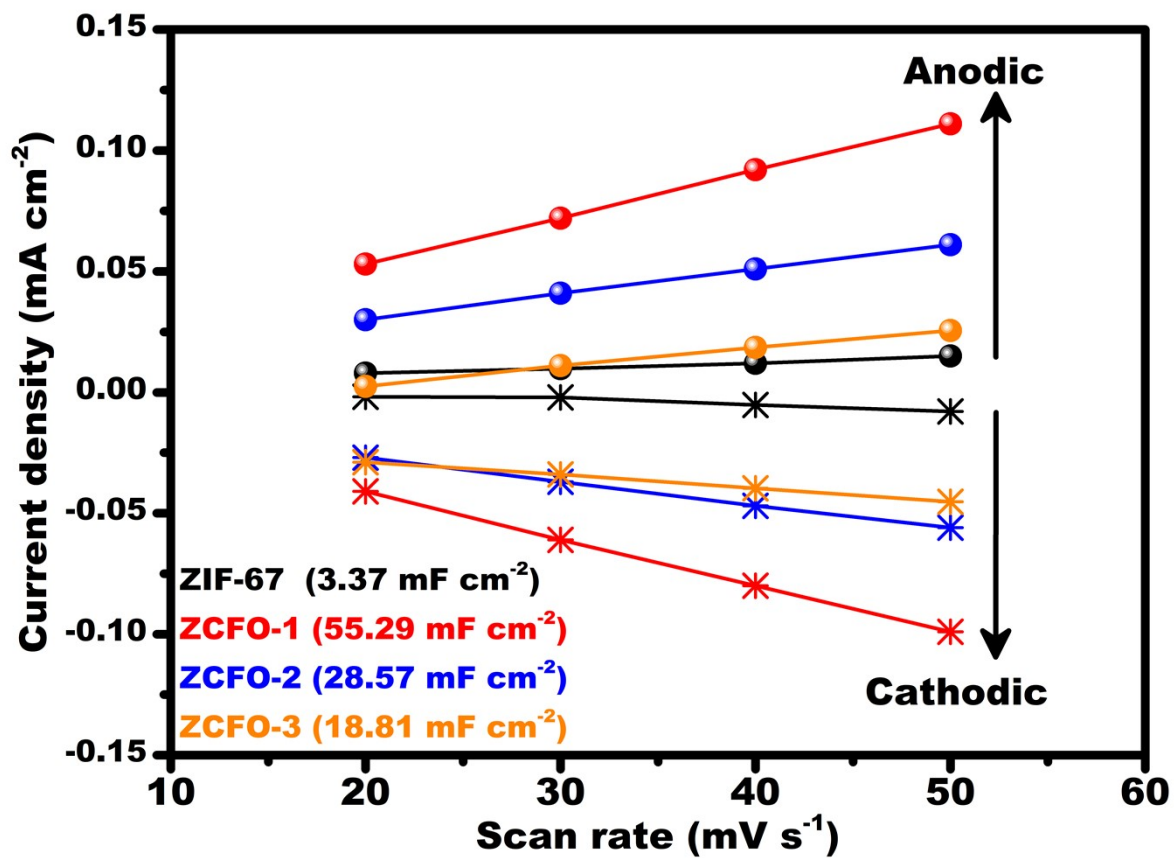

Fig. S7. Electrochemical double-layer capacity ( $C_{dl}$ ) of electrocatalysts.



Table. S1 Comparison of MOFs based electrocatalysts in MOR analysis

| Electrocatalyst            | Electrolyte               | MOR activity<br>Current/current<br>density | Ref             |
|----------------------------|---------------------------|--------------------------------------------|-----------------|
| Ni- doped ZIF-8            | 0.1 M NaOH & 0.05 M MeOH  | 0.744 mA cm <sup>-2</sup>                  | 3-43            |
| Ni- doped ZIF-67           | 0.1 M NaOH & 0.05 M MeOH  | 2.5 mA cm <sup>-2</sup>                    | 4-65            |
| Ni- doped MIL-110          | 0.1 M NaOH & 0.1 M MeOH   | 14.4 mA cm <sup>-2</sup>                   | 5-80            |
| Ni-MOF                     | 0.5 M NaOH & 4.0 M MeOH   | 90 mA cm <sup>-2</sup>                     | 6-78            |
| ZIF-8 thin film            | 0.5 M NaOH & 0.5 M MeOH   | 0.25 mA cm <sup>-2</sup>                   | 7-63            |
| MoS <sub>2</sub> @CoNi-ZIF | 1.0 M KOH & 0.5 M MeOH    | 430.08 mAcm <sup>-2</sup>                  | 8-114           |
| Ni/Zn-MOFs                 | 0.1 M NaOH & 4.76 mM MeOH | 300 μA                                     | 9-119           |
| Ni-BTC/ 4wt% rGO           | 1.0 M NaOH & 2.0 M MeOH   | 200.2 mAcm <sup>-2</sup>                   | 10-77           |
| ZIF-8                      | 1.0 M KOH & 0.5 M MeOH    | 21.32 mA g <sup>-1</sup>                   | Present<br>work |
| ZCFO-1                     | 1.0 M KOH & 0.5 M MeOH    | 40.84 mA g <sup>-1</sup>                   |                 |
| ZCFO-2                     | 1.0 M KOH & 0.5 M MeOH    | 29.72 mA g <sup>-1</sup>                   |                 |
| ZCFO-3                     | 1.0 M KOH & 0.5 M MeOH    | 24.83 mA g <sup>-1</sup>                   |                 |

Table. S2 Comparison of ZIF-8 and CoFe<sub>2</sub>O<sub>4</sub> based electrocatalysts in OER analysis

| Electrocatalyst                                            | Electrolyte | Overpotential<br>(10 mA cm <sup>-2</sup> ) | Tafel slope<br>(mV dce <sup>-1</sup> ) | Ref |
|------------------------------------------------------------|-------------|--------------------------------------------|----------------------------------------|-----|
| CFO                                                        | 1.0 M KOH   | 360                                        | 115                                    | 11  |
| CFO-Sn1                                                    | 1.0 M KOH   | 320                                        | 88                                     |     |
| CFO-Sn2                                                    | 1.0 M KOH   | 290                                        | 85                                     |     |
| CoFe <sub>2</sub> O <sub>4</sub> /NF                       | 1.0 M KOH   | 273                                        | 102                                    | 12  |
| CoFe <sub>2</sub> O <sub>4</sub> /biomass<br>carbon hybrid | 1.0 M NaOH  | 300                                        | 86                                     | 13  |
| CoFe <sub>2</sub> O <sub>4</sub> /SWNTs                    | 1.0 M KOH   | 310                                        | 85                                     | 14  |
| Au-CoFe <sub>2</sub> O <sub>4</sub>                        | 1.0 M KOH   | 312                                        | 46.8                                   | 15  |
| CoFe <sub>2</sub> O <sub>4</sub>                           | 1.0 M KOH   | 374                                        | 35                                     |     |

|                                                 |            |     |      |                 |
|-------------------------------------------------|------------|-----|------|-----------------|
| CoFe <sub>2</sub> O <sub>4</sub> Nanoplates     | 1.0 M NaOH | 410 | 61   | 16              |
| CoFe <sub>2</sub> O <sub>4</sub> /rGO           | 1.0 M KOH  | 340 | 31   | 17              |
| Reduced CoFe <sub>2</sub> O <sub>4</sub>        | 1.0 M KOH  | 320 | 94   | 18              |
| CoFe <sub>2</sub> O <sub>4</sub> NPs            | 1.0 M KOH  | 450 | 48   |                 |
| CoFe <sub>2</sub> O <sub>4</sub> -CoFex/C       | 1.0 M KOH  | 350 | ---  | 19              |
| ZIF-67@POM                                      | 1.0 M KOH  | 287 | 58   | 20              |
| ZIF-67@NPC-2 (2:1)                              | 0.1 M KOH  | 410 | 114  | 21              |
| CoO <sub>x</sub> -ZIF                           | 0.1 M NaOH | 318 | 70.3 | 22              |
| Co-ZIF-9                                        | 0.1 M KOH  | 510 | 93   | 23              |
| ZIF-8@ZIF-67@POM                                | 1.0 M KOH  | 490 | 88   | 24              |
| SiW <sub>9</sub> Co <sub>3</sub> [h]@ZIF-67     | 0.1 M KOH  | 420 | 94   | 25              |
| Fe/Ni <sub>2.4</sub> /Co <sub>0.4</sub> -MIL-53 | 1.0 M KOH  | 219 | 54   | 26              |
| ZIF-67-350                                      | 1.0 M KOH  | 286 | 84   | 27              |
| ZIF-L@Fe <sub>28</sub>                          | 1.0 M KOH  | 312 | 78   | 28              |
| ZIF-8                                           | 1.0 M KOH  | 380 | 189  | Present<br>work |
| ZCFO-1                                          | 1.0 M KOH  | 330 | 84   |                 |
| ZCFO-2                                          | 1.0 M KOH  | 350 | 88   |                 |
| ZCFO-3                                          | 1.0 M KOH  | 360 | 114  |                 |

1. Grdeń, M., Alsabet, M., & Jerkiewicz, G. (2012). Surface science and electrochemical analysis of nickel foams. *ACS Applied Materials and Interfaces*, 4(6), 3012–3021. <https://doi.org/10.1021/am300380m>.
2. McCrory, C. C. L., Jung, S., Peters, J. C., & Jaramillo, T. F. (2013). Benchmarking heterogeneous electrocatalysts for the oxygen evolution reaction. *Journal of the American Chemical Society*, 135(45), 16977–16987. <https://doi.org/10.1021/ja407115p>.
3. A. Samadi-Maybodi, S. Ghasemi, H. Ghaffari-Rad, Application of nano-sized nanoporous zinc 2-methylimidazole metal-organic framework for electrocatalytic oxidation of methanol in alkaline solution, *J. Power Sources* 303 (2016) 379–387.
4. F. Asadi, S.N. Azizi, S. Ghasemi, A novel non-precious catalyst containing transition metal in nanoporous cobalt based metal-organic framework (ZIF-67) for electrooxidation of methanol, *J. Electroanal. Chem.* 847 (2019), 113181.
5. Y. Wang, C. Liu, J. Xiang, L. Xing, X. Ou, S. Chen, X. Xue, F. Yu, R. Li, Electrocatalytic oxidation of methanol on nickel doped metalorganic frameworks MIL-110 modified glassy

- carbon electrode in alkaline medium, *Int. J. Electrochem. Sci.* 14 (2016) 5247–5258.
6. N. Wang, S. Liang, L. Zhang, P. Cao, L. Xu, M. Lin, Ionic liquid supported nickel-based metal-organic framework for electrochemical sensing of hydrogen peroxide and electrocatalytic oxidation of methanol, *Colloids Surf. A* 603 (2020), 125199.
  7. S.J. Hoseini, M. Bahrami, S.M. Nabavizadeh, ZIF-8 nanoparticles thin film at an oil-water interface as an electrocatalyst for the methanol oxidation reaction without the application of noble metals, *New J. Chem.* 43 (2019) 15811–15822.
  8. Y. Liu, B. Hu, S. Wu, M. Wang, Z. Zhang, B. Cui, L. He, M. Du, Hierarchical nanocomposite electrocatalyst of bimetallic zeolitic imidazolate framework and MoS<sub>2</sub> sheets for non-Pt methanol oxidation and water splitting, *Appl. Catal. B Environ.* 258 (2019), 117970.
  9. A.P., B. Habibi, Nickel ions incorporated zinc-mesoporous metal organic frameworks thin films nanocomposite modified glassy carbon electrode for electrocatalytic oxidation of methanol in alkaline media, *New J. Chem.* 45 (2021) 2597–2608.
  10. L. Yaqoob, T. Noor, N. Iqbal, H. Nasir, N. Zaman, Development of nickel-BTC-MOF-derived nanocomposites with rGO towards electrocatalytic oxidation of methanol and its product analysis, *Catalysts* 9 (2019) 856.
  11. T.V.M. Sreekanth, N. D. Nam, J. Kim, K. Yoo, SnO<sub>2</sub> QDs@CoFe<sub>2</sub>O<sub>4</sub> NPs as an efficient electrocatalyst for methanol oxidation and oxygen evolution reactions in alkaline media, *Journal of Electroanalytical Chemistry*, 2020, 873, 114363.
  12. S. Zhu, J. Lei, Y. Qin, L. Zhang, L. Lu, Spinel oxide CoFe<sub>2</sub>O<sub>4</sub> grown on Ni foam as an efficient electrocatalyst for oxygen evolution reaction, *RSC Advances*, 2019, 9, 13269-13274.
  13. S. Bi, J. Li, Q. Zhong, C. Chen, Q. Zhang, Y. Yao, Low-cost CoFe<sub>2</sub>O<sub>4</sub>/biomass carbon hybrid from metal-enriched sulfate reducing bacteria as an electrocatalyst for water oxidation, *RSC Adv.*, 2018, 8, 22799.
  14. Y. Ding, J. Zhao, W. Zhang, J. Zhang, X. Chen, F. Yang, X. Zhang, Single-Walled Carbon Nanotubes Wrapped CoFe<sub>2</sub>O<sub>4</sub> Nanorods with Enriched Oxygen Vacancies for Efficient Overall Water Splitting, *ACS Appl. Energy Mater.* 2019, 2, 1026-1032.
  15. G. Zhu, X. Li, Y. Liu, W. Zhu, X. Shen, Activating CoFe<sub>2</sub>O<sub>4</sub> electrocatalysts by trace Au for enhanced oxygen evolution activity, *Applied Surface Science.*, 2019, 478, 206-212.
  16. C. Mahala, M. D. Sharma, M. Basu, 2D nanostructures of CoFe<sub>2</sub>O<sub>4</sub> and NiFe<sub>2</sub>O<sub>4</sub>: efficient

- oxygen evolution catalyst, *Electrochimica Acta*, 2018, 273, 462-473.
17. J. Geng, L. Kuai, E. Kan, Q. Wang, B. Geng, Precious-Metal-Free Co-Fe-O/rGO Synergetic Electrocatalysts for Oxygen Evolution Reaction by a Facile Hydrothermal Route, *ChemSusChem*, 2015, 8, 659-664.
  18. K-L. Yan, X. Shang, Z-Z Liu, B. Dong, S-S. Lu, J-Q Chi, W-K Gao, Y-M. Chai, C-G Liu, A facile method for reduced CoFe<sub>2</sub>O<sub>4</sub> nanosheets with rich oxygen vacancies for efficient oxygen evolution reaction, *International Journal of Hydrogen Energy*, 2017, 42, 24150-24158.
  19. M. Sun, D. Lin, S. Wang, T. Zhang, D. Wang, J. Li, Facile Synthesis of CoFe<sub>2</sub>O<sub>4</sub>-CoFex/C Nanofibers Electrocatalyst for the Oxygen Evolution Reaction, *Journal of The Electrochemical Society*, 166 (10) H412-H417 (2019).
  20. Q. Y. Li, L. Zhang, Y. X. Xu, Q. Li, H. Xue and H. Pang, *ACS Sustain. Chem. Eng.*, 2019, 7, 5027–5033.
  21. H. Wang, F.-X. Yin, B.-H. Chen, X.-B. He, P.-L. Lv, C.-Y. Ye and D.-J. Liu, *Appl. Catal. B Environ.*, 2017, 205, 55–67.
  22. S. Dou, C.-L. Dong, Z. Hu, Y.-C. Huang, J. Chen, L. Tao, D. Yan, D. Chen, S. Shen, S. Chou and S. Wang, *Adv. Funct. Mater.*, 2017, 27, 1702546.
  23. S. Wang, Y. Hou, S. Lin and X. Wang, *Nanoscale*, 2014, 6, 9930.
  24. Y Wang, Y Wang, Li Zhang, et al., *Inorg. Chem. Front.* 6 (2019) 2514-2520.
  25. V.K. Abdelkader-Fernández, D.M. Fernandes, S.S. Balula, et al., *J. Mater. Chem. A*. 8 (2020) 13509-13521.
  26. F. L Li, Q. Shao, X Huang, et al., *Angew. Chem. Int. Ed.* 57 (2018) 1888-1892.
  27. R. M Zhu, J. W Ding, J. P Yang, et al., *ACS Appl. Mater. Interfaces* 12 (2020) 25037–25041.
  28. Z. Xiao and F. Xu, A two-dimensional zeolitic imidazolate framework loaded with an acrylate-substituted oxoiron cluster as an efficient electrocatalyst for the oxygen evolution reaction, *New J. Chem.*, 2022, 46, 11095-11100.
